# Supplementary material for: Hospital Admissions Due to Ischemic Heart Diseases and Prescriptions of Cardiovascular Diseases Medications in England and Wales in the Past Two Decades
Source: MDPI journal article supplement (doi:10.3390/ijerph18137041), 2021-07-01
Supplement: s1 [file s1]

**Supplementary material:**

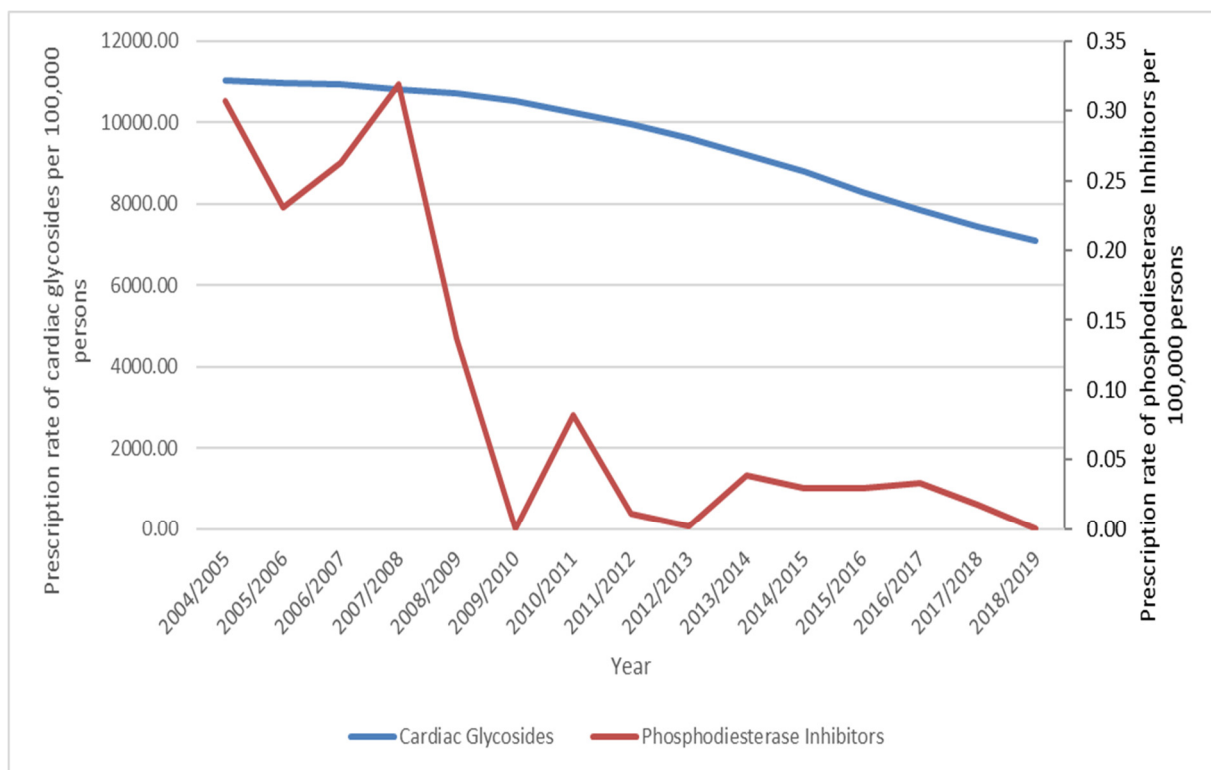

Figure S1: Positive inotropic drugs

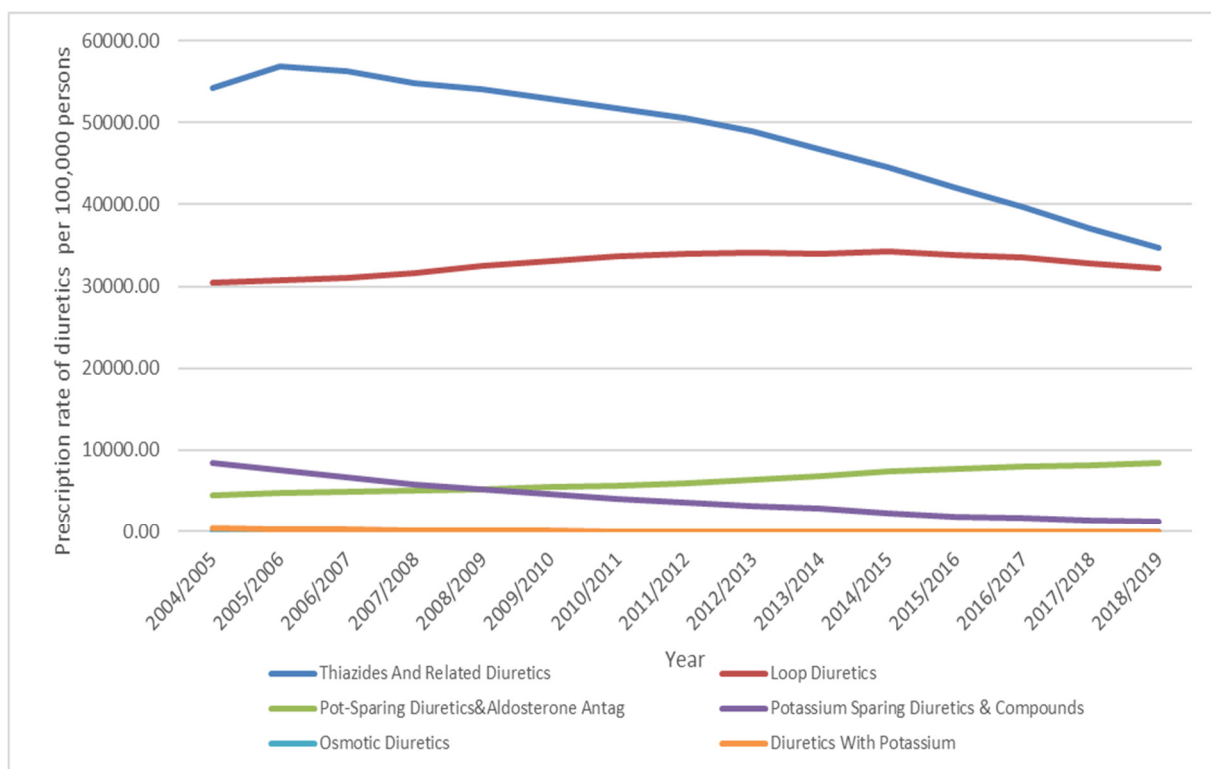

Figure S2: Diuretics

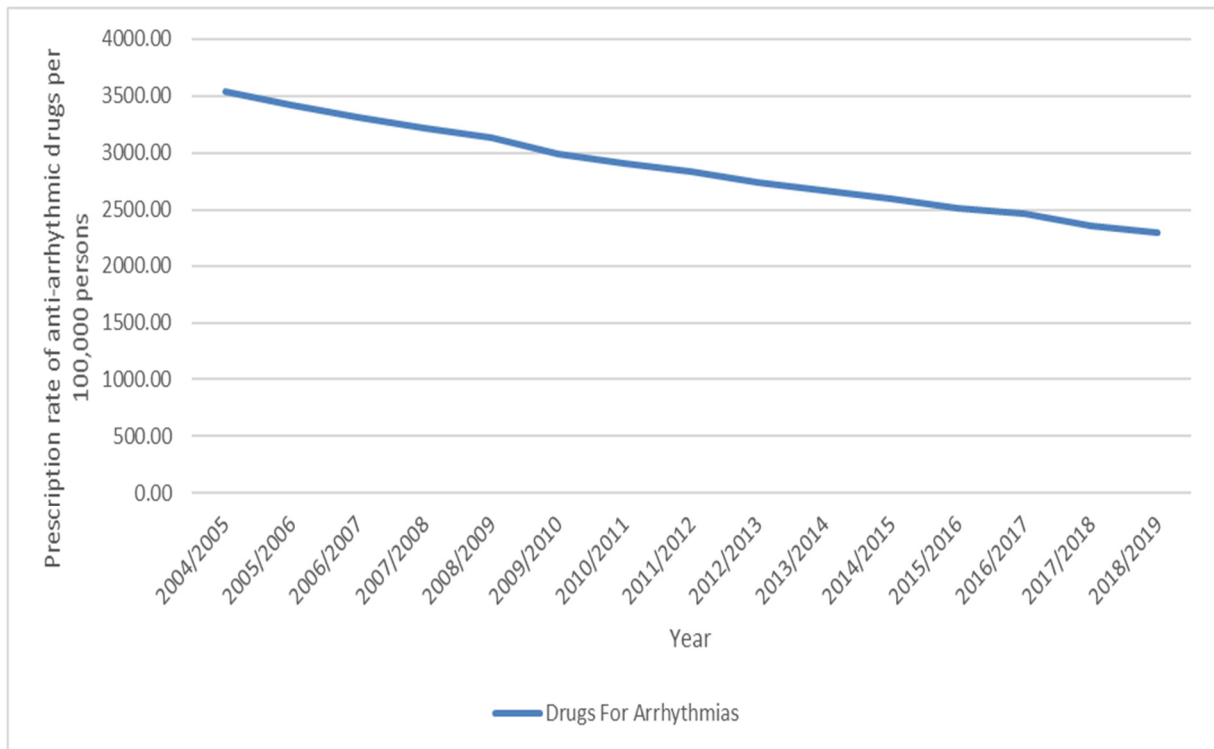

Figure S3: Anti-arrhythmic drugs

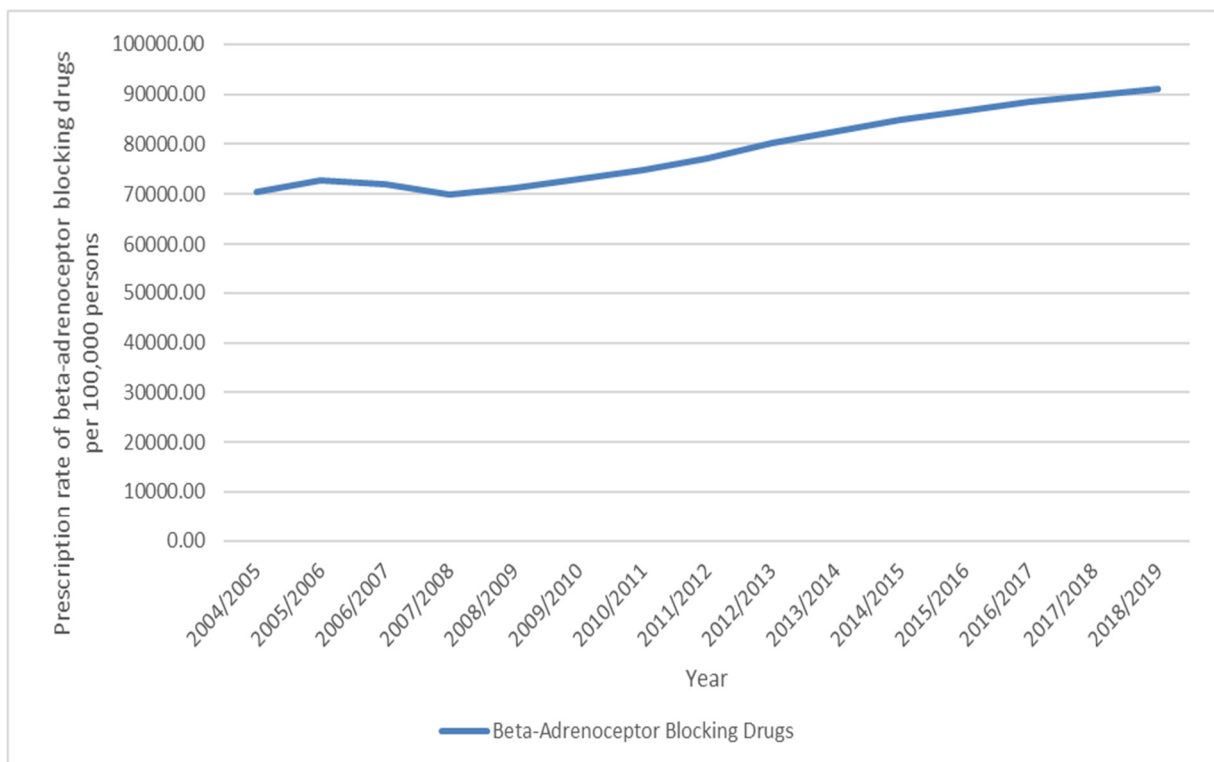

Figure S4: Beta-adrenoceptor blocking drugs

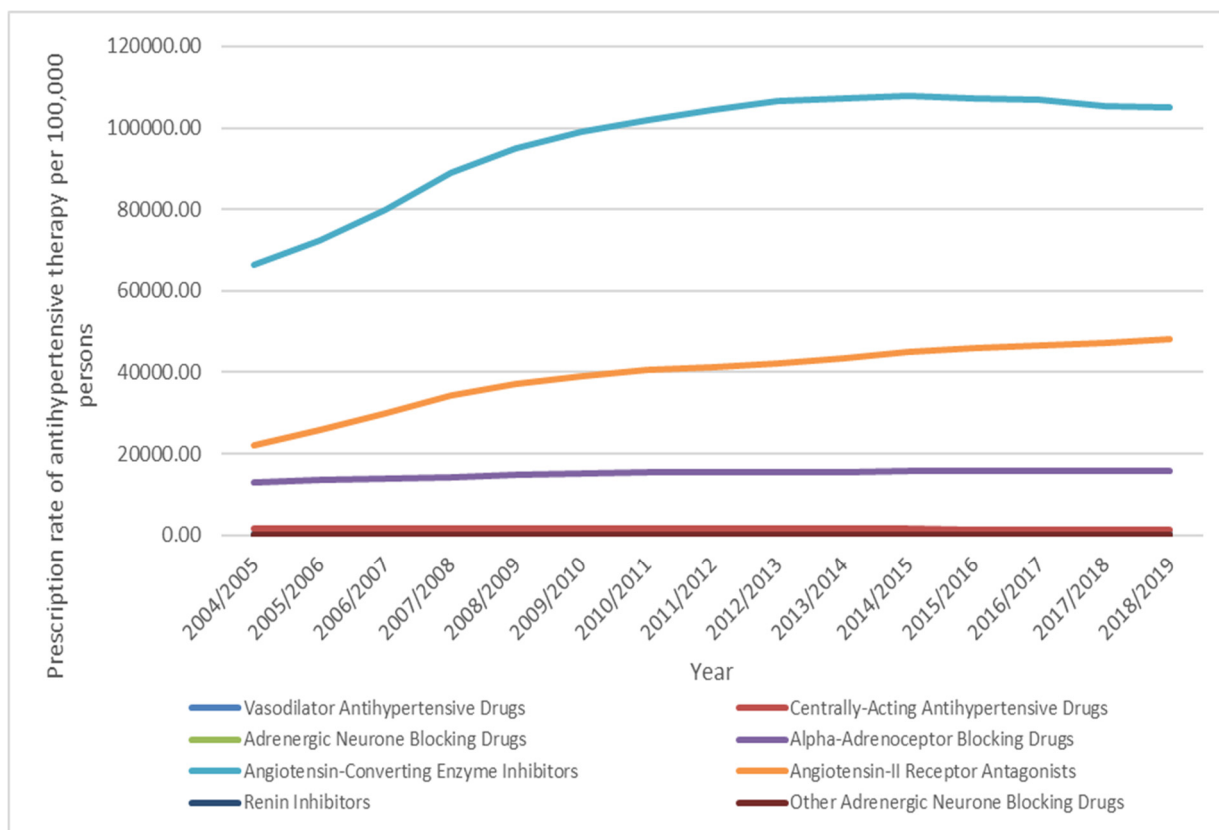

Figure S5: Antihypertensive therapies

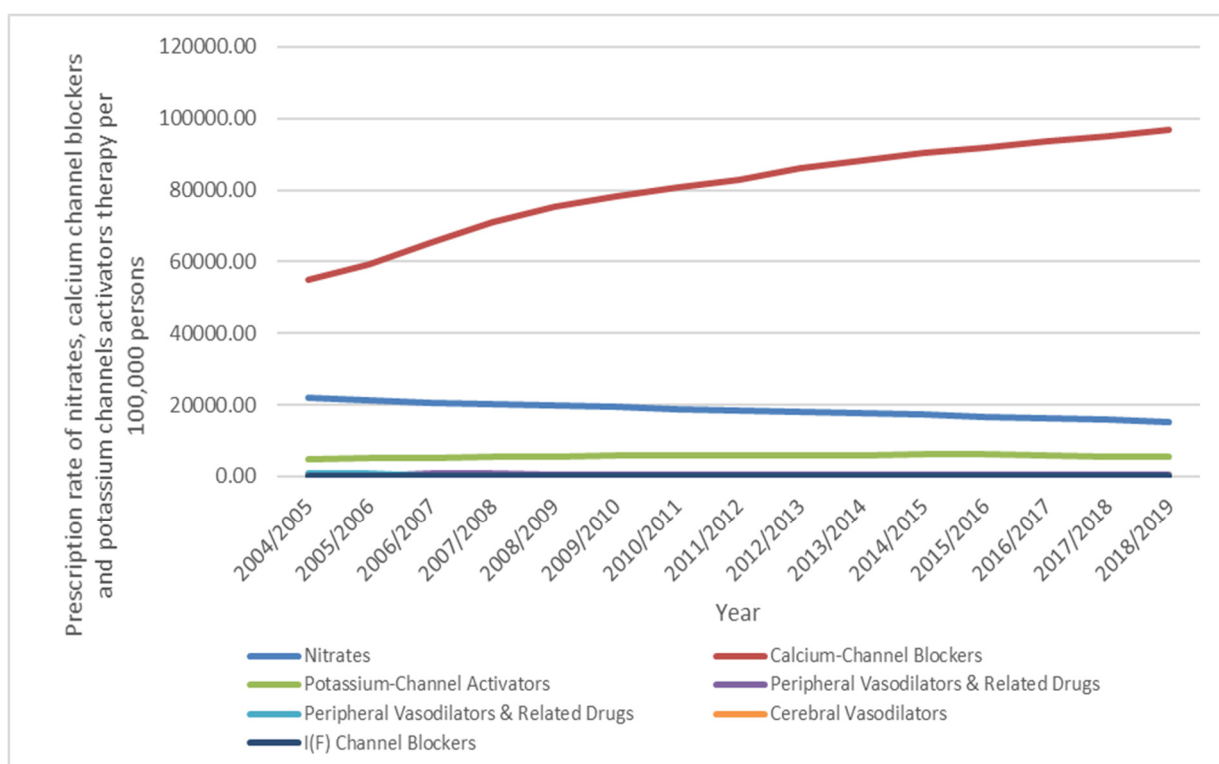

Figure S6: Nitrates, Calcium channel blockers and potassium channels activators

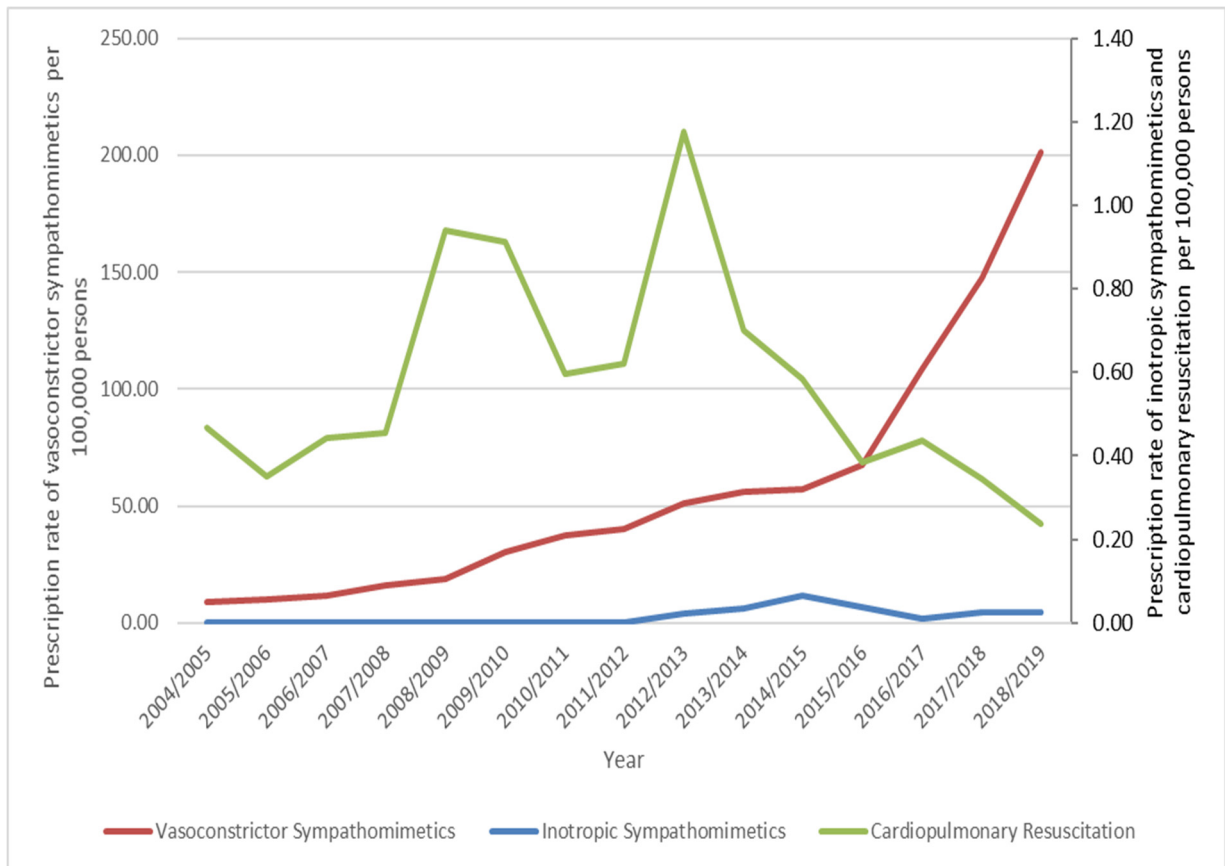

Figure S7: Sympathomimetics

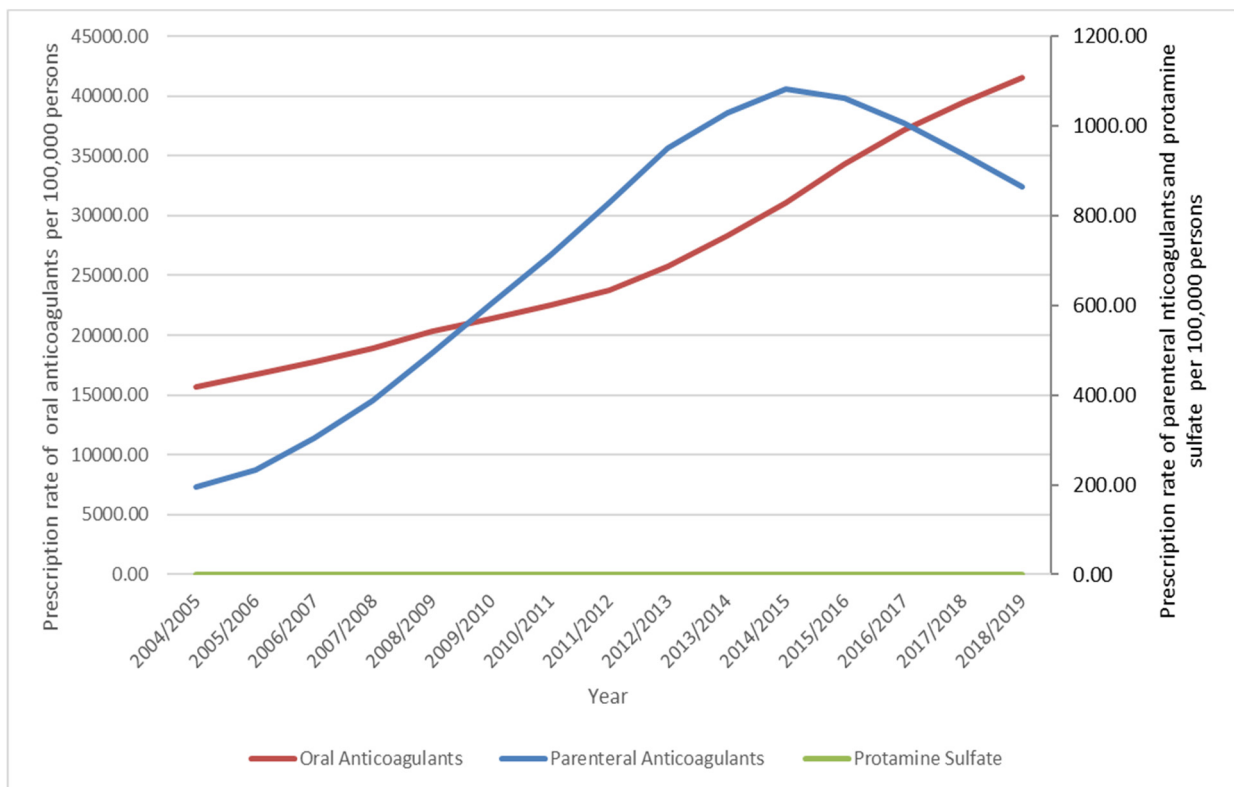

Figure S8: Anticoagulants and protamine sulfate

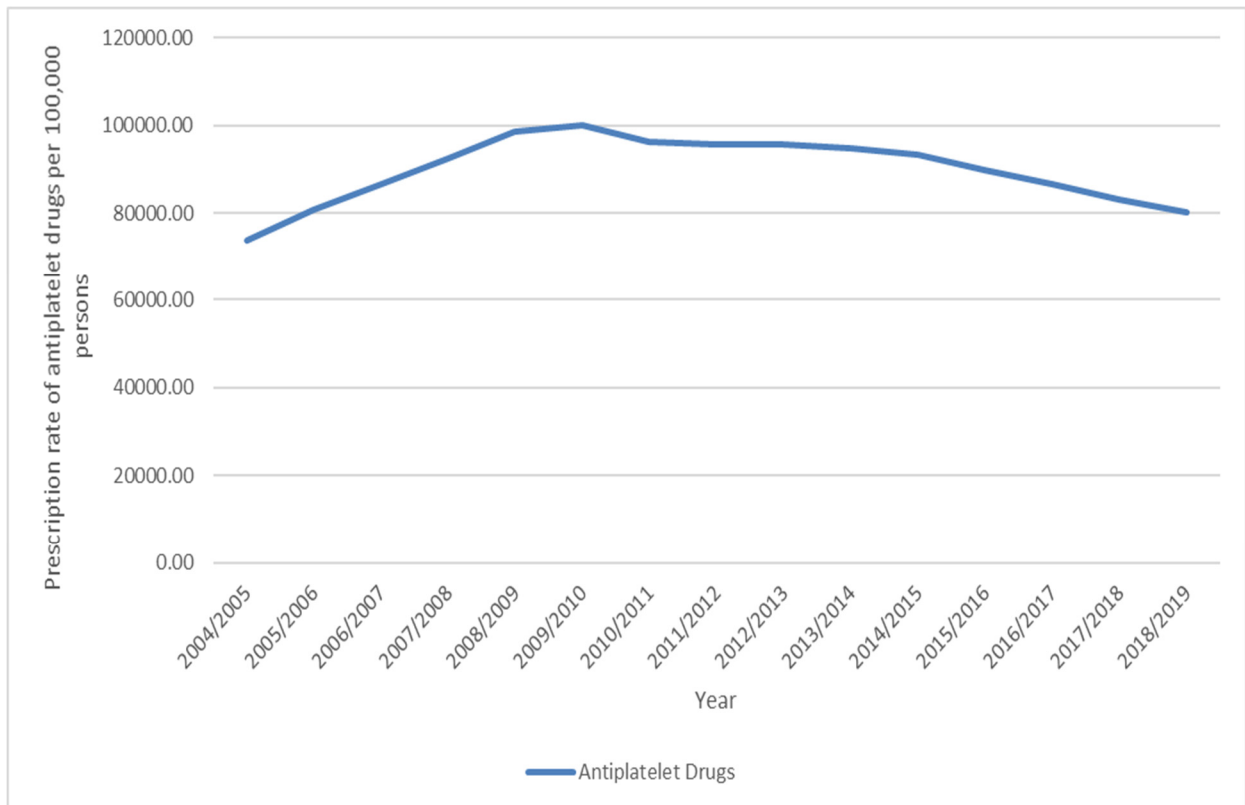

Figure S9: Antiplatelet drugs

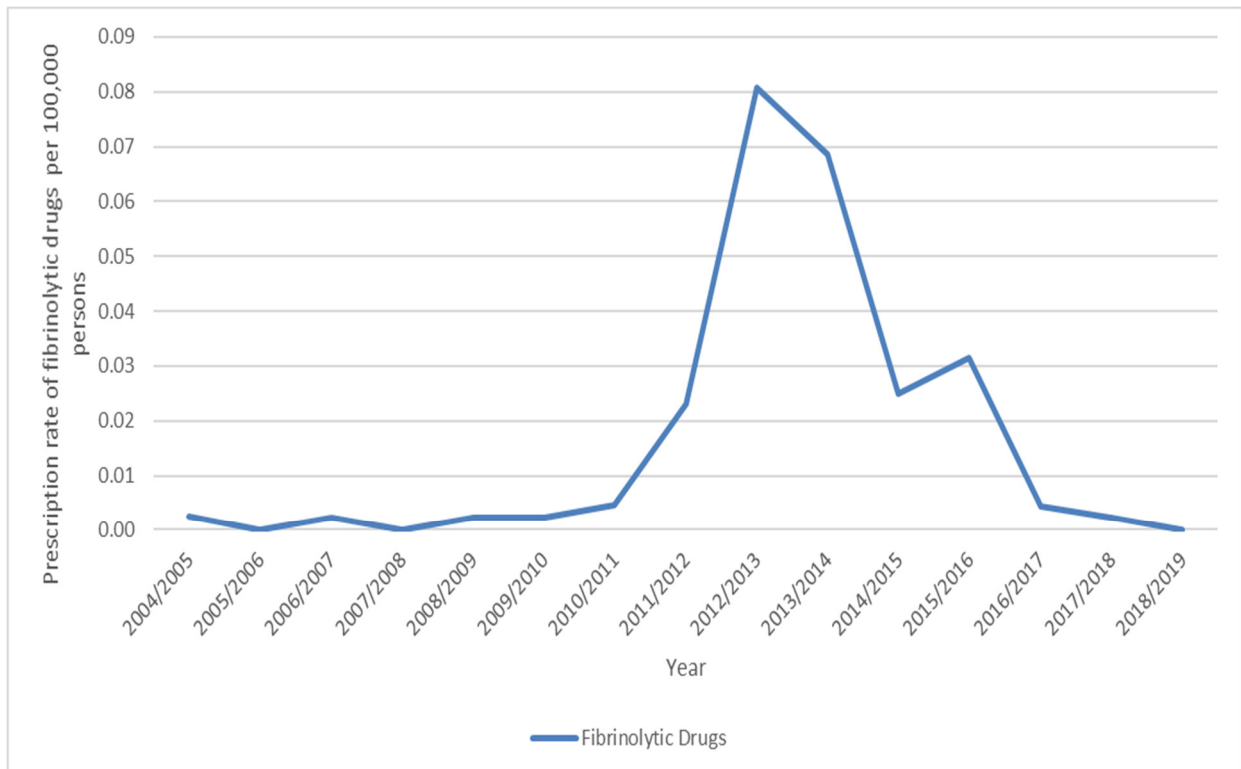

Figure S10: Fibrinolytic drugs

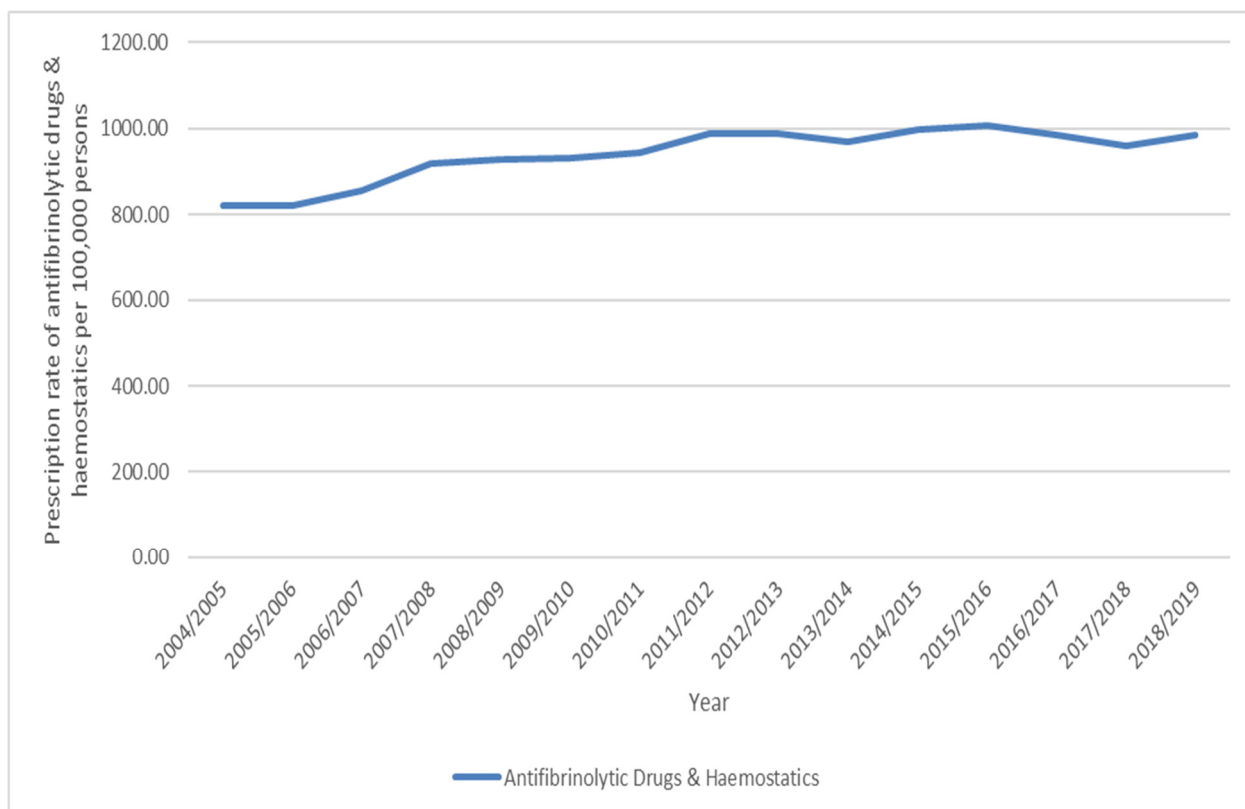

Figure S11: Antifibrinolytic drugs and haemostatics

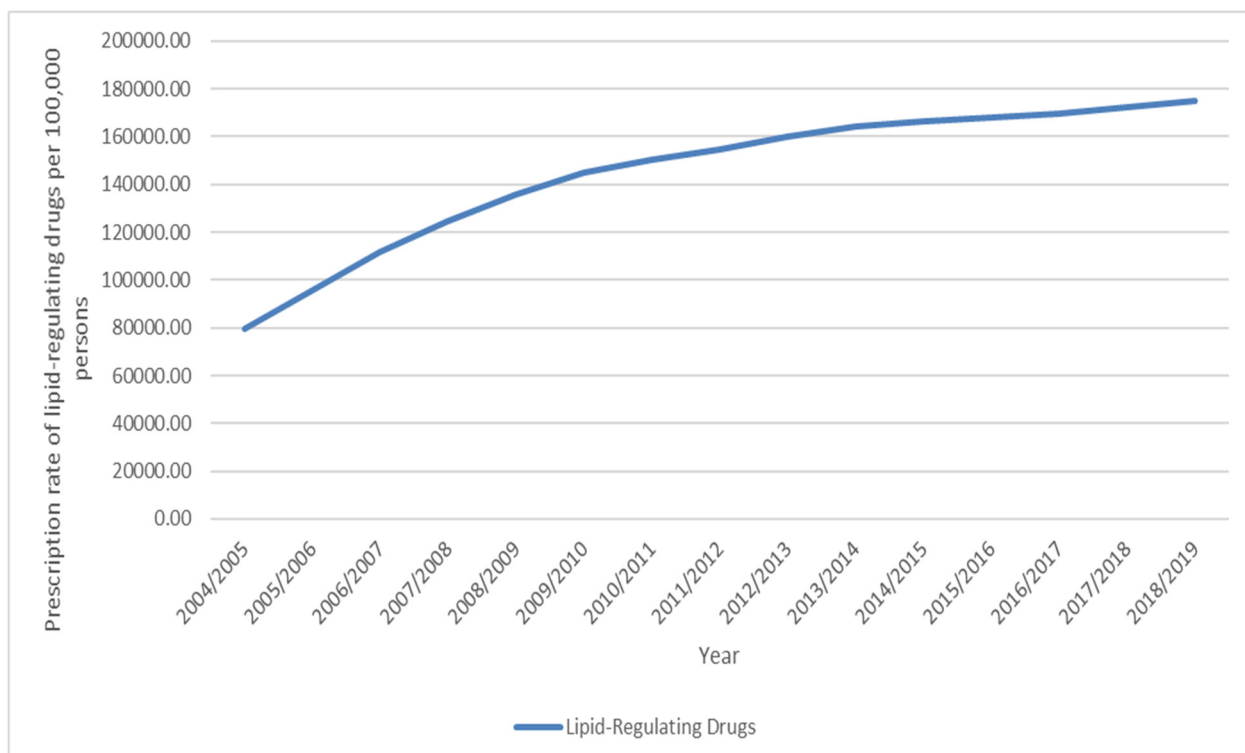

Figure S12: Lipid-regulating drugs

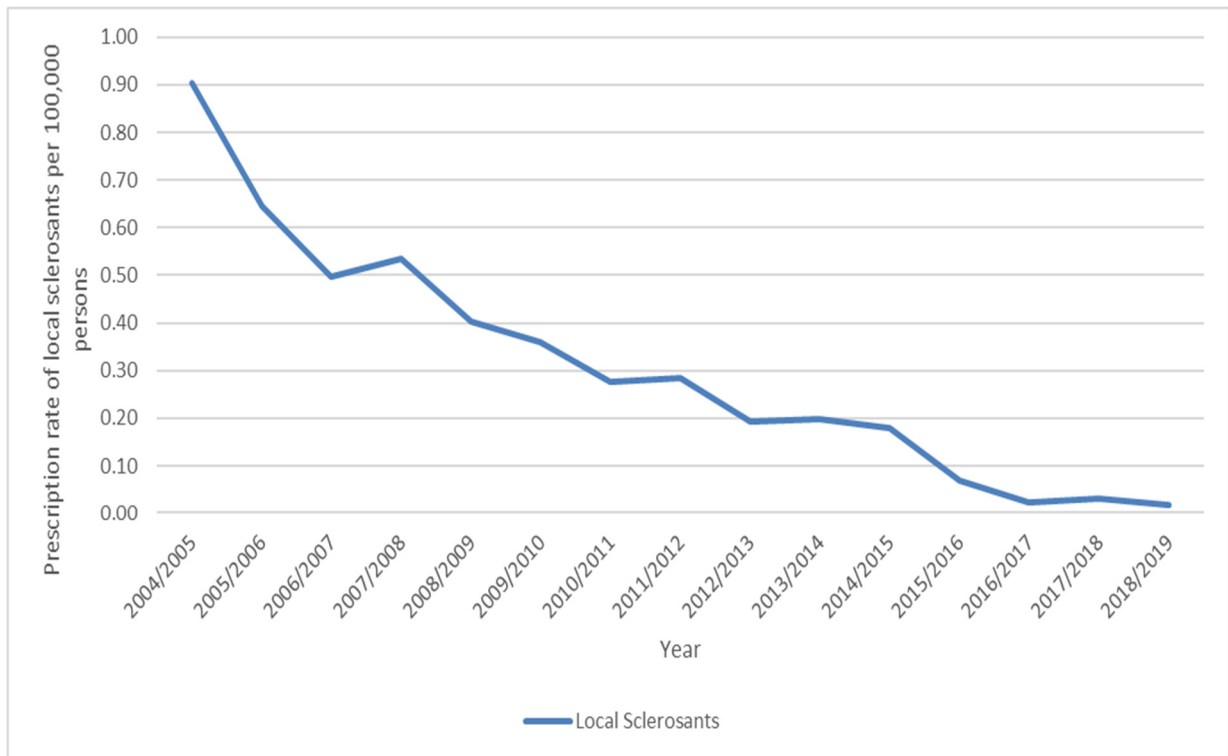

Figure S13: Local sclerosants
